# Supplementary material for: Unveiling the role of water in enhancing the performance of zinc-ion batteries using dimethyl sulfoxide electrolyte and the manganese dioxide cathode
Source: Royal Society of Chemistry journal article supplement (doi:10.1039/d3ta01014g), 2023-01-01
Supplement: d3ta01014g1.pdf [file d3ta01014g1.pdf]

## Supplementary information

### Unveiling the role of water in enhancing the performance of zinc-ion batteries using dimethyl sulfoxide electrolyte and the manganese dioxide cathode

Wathanyu Kao-ian<sup>a</sup>, Jinnawat Sangsawang<sup>a</sup>, Pinit Kidkhunthod<sup>b</sup>, Suttipong Wannapaiboon<sup>b</sup>, Manaswee Suttipong<sup>c</sup>, Prasit Pattananuwat<sup>d,e</sup>, Mai Thanh Nguyen<sup>f</sup>, Tetsu Yonezawa<sup>f</sup> and Soorathep Kheawhom<sup>a,e,g</sup>

<sup>a</sup> Department of Chemical Engineering, Faculty of Engineering, Chulalongkorn University, Bangkok 10330, Thailand

<sup>b</sup> Synchrotron Light Research Institute, 111 University Avenue, Muang District, Nakhon Ratchasima 30000, Thailand

<sup>c</sup> Department of Chemical Technology, Faculty of Science, Chulalongkorn University, Bangkok 10330, Thailand

<sup>d</sup> Department of Materials Science, Faculty of Science, Chulalongkorn University, Bangkok 10330, Thailand

<sup>e</sup> Center of Excellence on Advanced Materials for Energy Storage, Chulalongkorn University, Bangkok 10330, Thailand

<sup>f</sup> Division of Materials Science and Engineering, Faculty of Engineering, Hokkaido University, Hokkaido 060-8628, Japan

<sup>g</sup> Bio-Circular-Green-economy Technology & Engineering Center (BCGeTEC), Faculty of Engineering, Chulalongkorn University, Bangkok 10330, Thailand

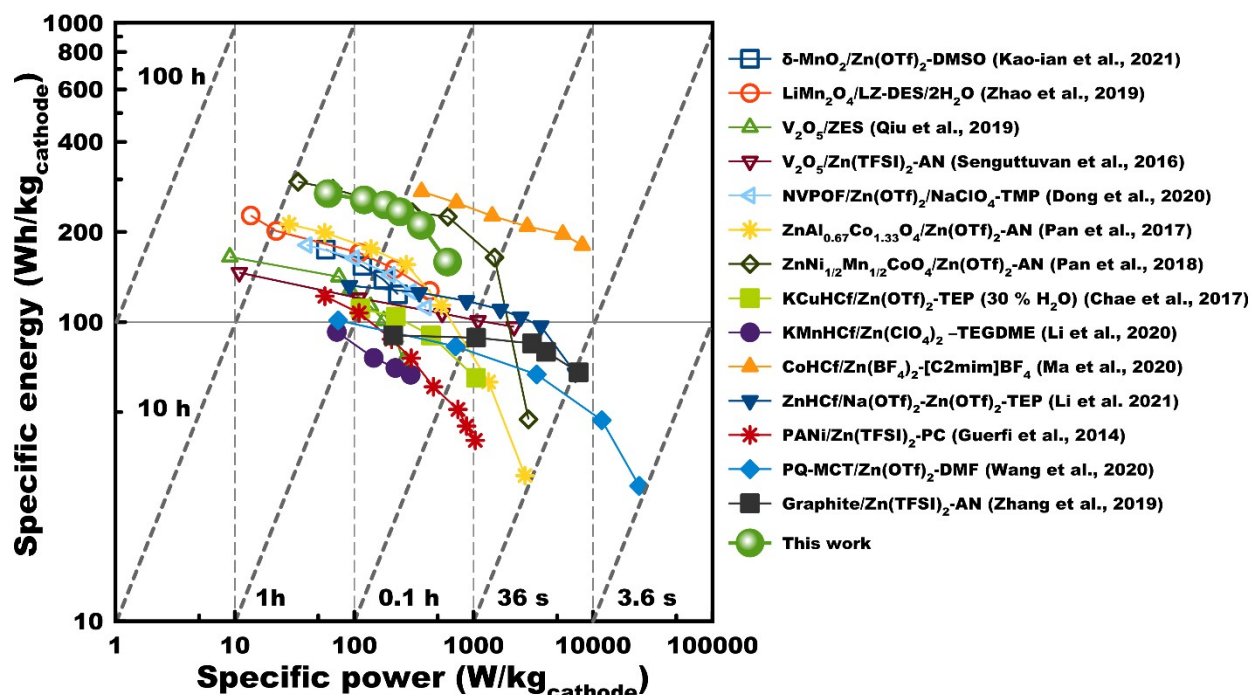

Figure S1. The Ragone plot of different nonaqueous zinc-ion batteries [1-15].

Table S1. Specific capacity of AZIBs based on MnO<sub>2</sub> cathodes.

| Electrolyte                                                                                                             | Phase of MnO <sub>2</sub>  | Testing window (V) | Specific capacity (mAh/g) | Ref. |
|-------------------------------------------------------------------------------------------------------------------------|----------------------------|--------------------|---------------------------|------|
| Aqueous 1 M ZnSO <sub>4</sub>                                                                                           | $\alpha$ -MnO <sub>2</sub> | 1.0-1.8 V          | 233 mAh/g at 83 mA/g      | [16] |
| Aqueous 2 M ZnSO <sub>4</sub> + 0.1 M MnSO <sub>4</sub>                                                                 | $\alpha$ -MnO <sub>2</sub> | 1.0-1.8 V          | 285 mAh/g at 103 mA/g     | [17] |
| Aqueous 1 M ZnSO <sub>4</sub> + 0.1 M MnSO <sub>4</sub>                                                                 | $\beta$ -MnO <sub>2</sub>  | 1.0-1.8 V          | 270 mAh/g at 100 mA/g     | [18] |
| Aqueous 3 M Zn(CF <sub>3</sub> SO <sub>3</sub> ) <sub>2</sub> + 0.1 M Mn(CF <sub>3</sub> SO <sub>3</sub> ) <sub>2</sub> | $\beta$ -MnO <sub>2</sub>  | 0.8-1.9 V          | 225 mAh/g at 0.65 C       | [19] |
| Aqueous 1 M ZnSO <sub>4</sub>                                                                                           | $\delta$ -MnO <sub>2</sub> | 1.0-1.8 V          | 252 mAh/g at 83 mA/g      | [20] |
| Aqueous 1 M ZnSO <sub>4</sub> + 0.1 M MnSO <sub>4</sub>                                                                 | $\delta$ -MnO <sub>2</sub> | 1.0-1.8 V          | 170 mAh/g at 100 mA/g     | [21] |

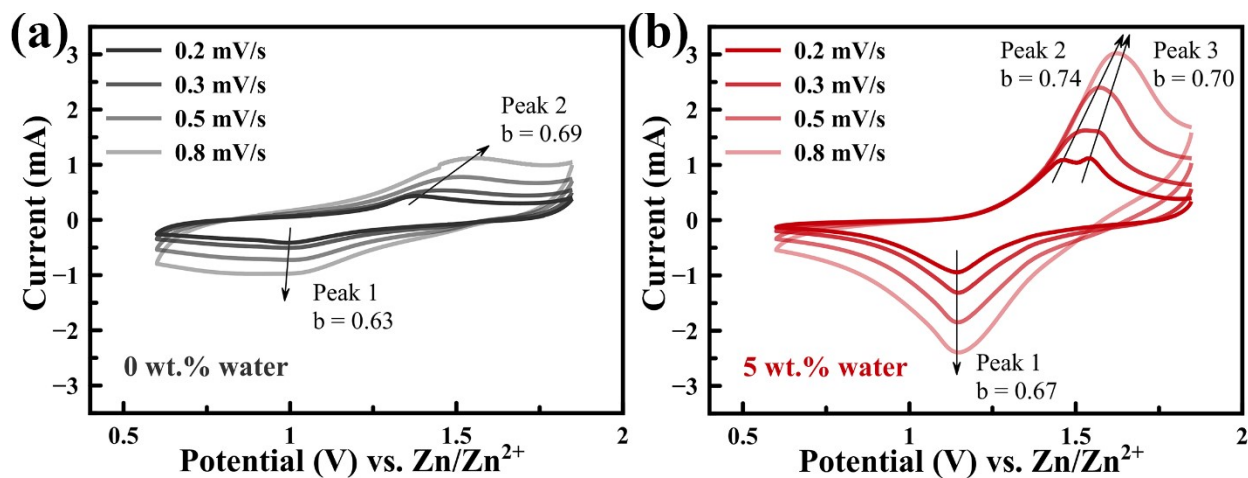

**Figure S2.** CV curves of sample having (a) 0 wt.% water, and (b) 5 wt.% water at 0.2, 0.3, 0.5 and 0.8 mV/s in the range: 0.6-1.85 V vs. Zn/Zn<sup>2+</sup>.

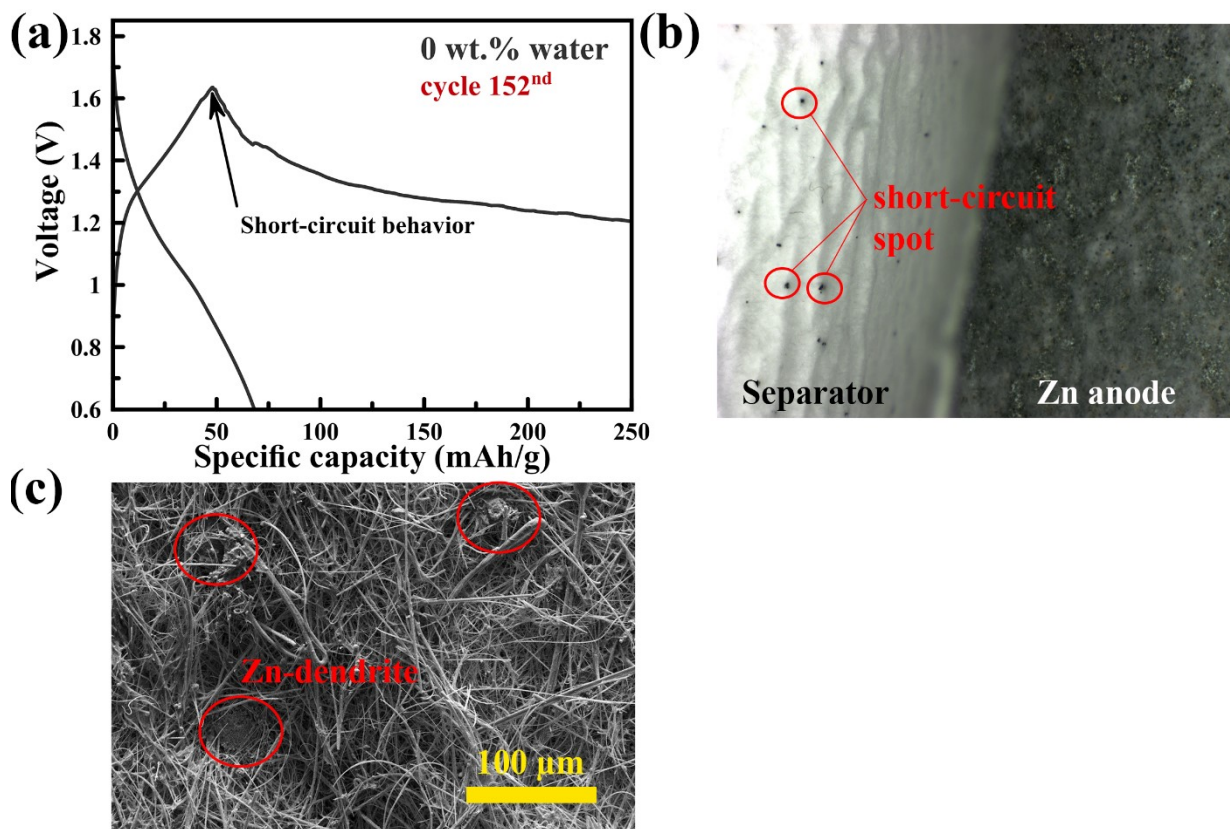

**Figure S3.** Evidence of the short-circuit occurred in the 0 wt.% water sample: (a) Voltage profile at 152<sup>rd</sup> cycles, (b) Image obtained via optical microscope of the anode/separator contact, and (c) FE-SEM image of the dark spot on the separator.

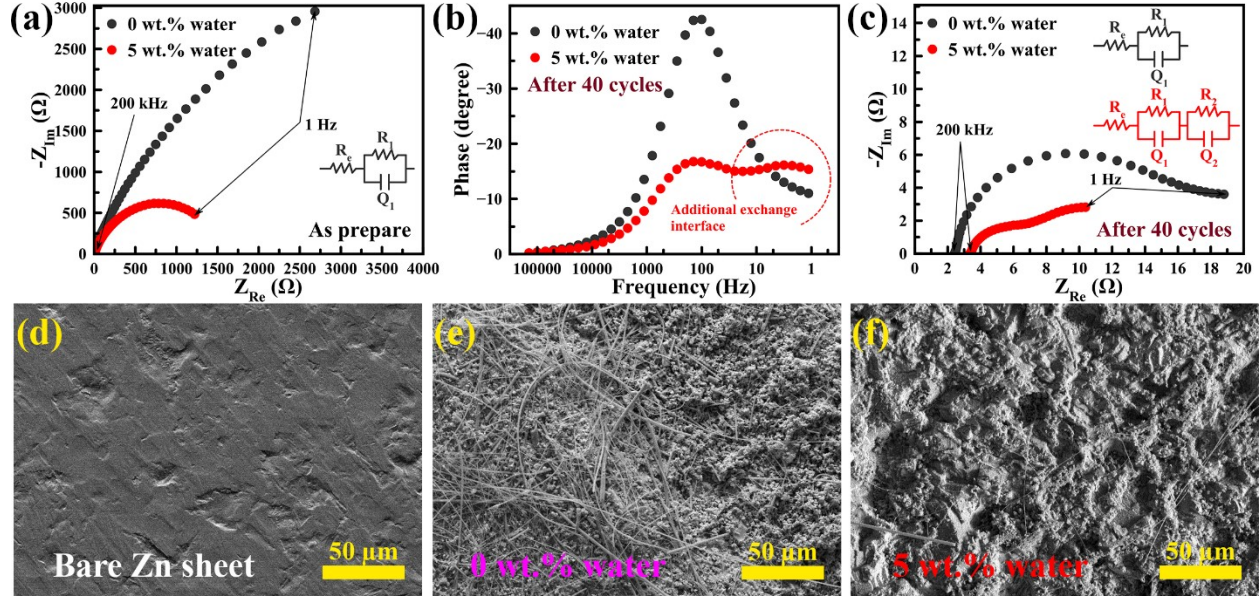

**Figure S4.** (a-c) EIS results of the Zn symmetrical cells: (a) Nyquist plot of the as-prepare sample, (b) Phase-bode plot of the cycled samples (40<sup>th</sup> cycle), and (c) Nyquist plot of the cycled samples (40<sup>th</sup> cycle), (d-e) FE-SEM images: (d) Bare Zn sheet, (e) 0 wt.% water sample, and (f) 5 wt.% water sample.

**Table S2.** EIS fitting results of Zn symmetrical cells: 0 and 5 wt.% water.

| Components                                                                   | 0 wt.% water (As prepare)  | 0 wt.% water (After 40 <sup>th</sup> ) | 5 wt.% water (As prepare)    | 5 wt.% water (After 40 <sup>th</sup> ) |
|------------------------------------------------------------------------------|----------------------------|----------------------------------------|------------------------------|----------------------------------------|
| Internal resistance of the cell: $R_e$                                       | 2.23 $\Omega$              | 2.43 $\Omega$                          | 3.38 $\Omega$                | 3.37 $\Omega$                          |
| Charge-transfer resistance of the Zn electrode: $R_1$                        | $8.91 \times 10^3 \Omega$  | 14.58 $\Omega$                         | $1.63 \times 10^3 \Omega$    | 3.65 $\Omega$                          |
| Capacitive double layer of the Zn electrode: $Q_1 (Y_0, n)$                  | $3.91 \times 10^{-5}, 0.8$ | $5.39 \times 10^{-4}, 0.89$            | $6.712 \times 10^{-5}, 0.82$ | $1.99 \times 10^{-3}, 0.77$            |
| Charge-transfer resistance of the additional exchange interface: $R_2$       | -                          | -                                      | -                            | 7.30 $\Omega$                          |
| Capacitive double layer of the additional exchange interface: $Q_2 (Y_0, n)$ | -                          | -                                      | -                            | $2.20 \times 10^{-2}, 0.79$            |

**Table S3.** EIS fitting results of the full cells: 0 and 5 wt.% water.

| <b>Components</b>                                                                                   | <b>0 wt.% water (After 10<sup>th</sup>)</b> | <b>5 wt.% water (After 10<sup>th</sup>)</b> |
|-----------------------------------------------------------------------------------------------------|---------------------------------------------|---------------------------------------------|
| Internal resistance of the battery:<br><b>R<sub>e</sub></b>                                         | 2.28 $\Omega$                               | 2.93 $\Omega$                               |
| Charge-transfer resistance of the<br>Zn anode: <b>R<sub>1</sub></b>                                 | 4.09 $\Omega$                               | 1.52 $\Omega$                               |
| Capacitive double layer of the<br>Zn anode: <b>C<sub>1</sub></b>                                    | 1.07 $\times 10^{-5}$ F                     | 1.16E $\times 10^{-5}$ F                    |
| Charge-transfer resistance of the<br>MnO <sub>2</sub> cathode: <b>R<sub>2</sub></b>                 | 15.27 $\Omega$                              | 8.85 $\Omega$                               |
| Capacitive double layer of the<br>MnO <sub>2</sub> cathode: <b>Q<sub>2</sub> (Y<sub>0</sub>, n)</b> | 4.85 $\times 10^{-3}$ , 0.75                | 3.59 $\times 10^{-3}$ , 0.75                |
| Warburg diffusion impedance of<br>the MnO <sub>2</sub> cathode: <b>W (Y<sub>0</sub>)</b>            | 1.86 $\times 10^{-2}$                       | 7.15 $\times 10^{-2}$                       |



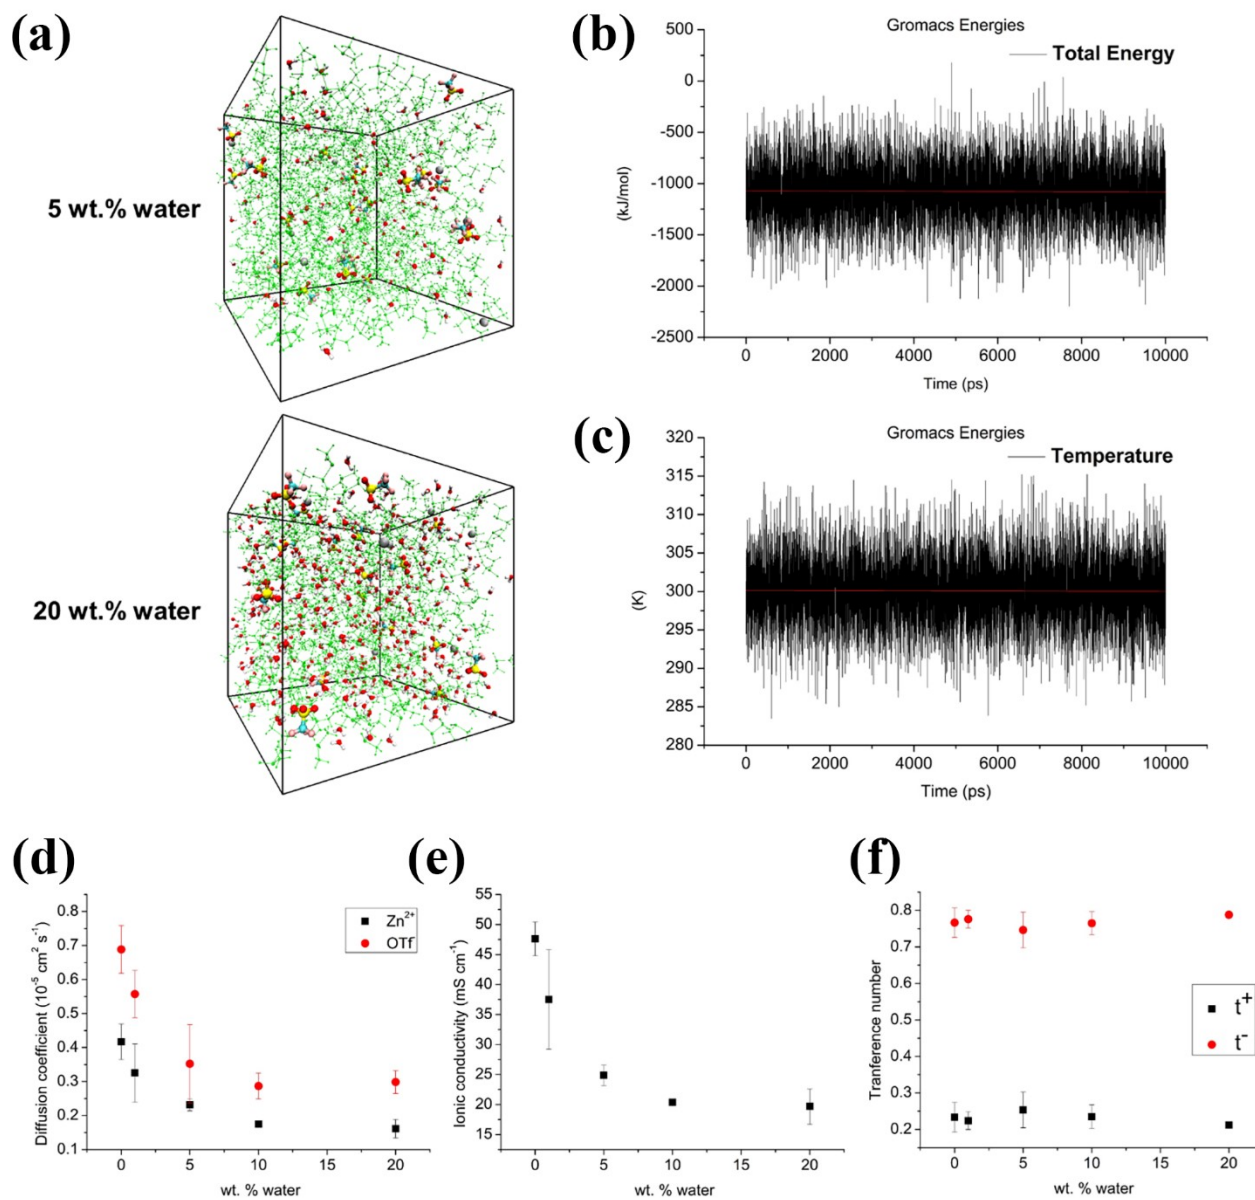

**Figure S5.** MD simulation results of bulk electrolyte solutions, consisting of Zn(OTf)<sub>2</sub> in DMSO with the addition of water: (a) Examples of simulation boxes, including 5 wt.% water and 20 wt.% water added electrolytes, (b) Total energy analysis of 5 wt.% water added system, (c) Equilibrated temperature plot of 5 wt.% water added system, (d) Diffusion coefficient of Zn<sup>2+</sup> and OTf<sup>-</sup>, (e) Ionic conductivity of electrolytes, and (f) Transference number.

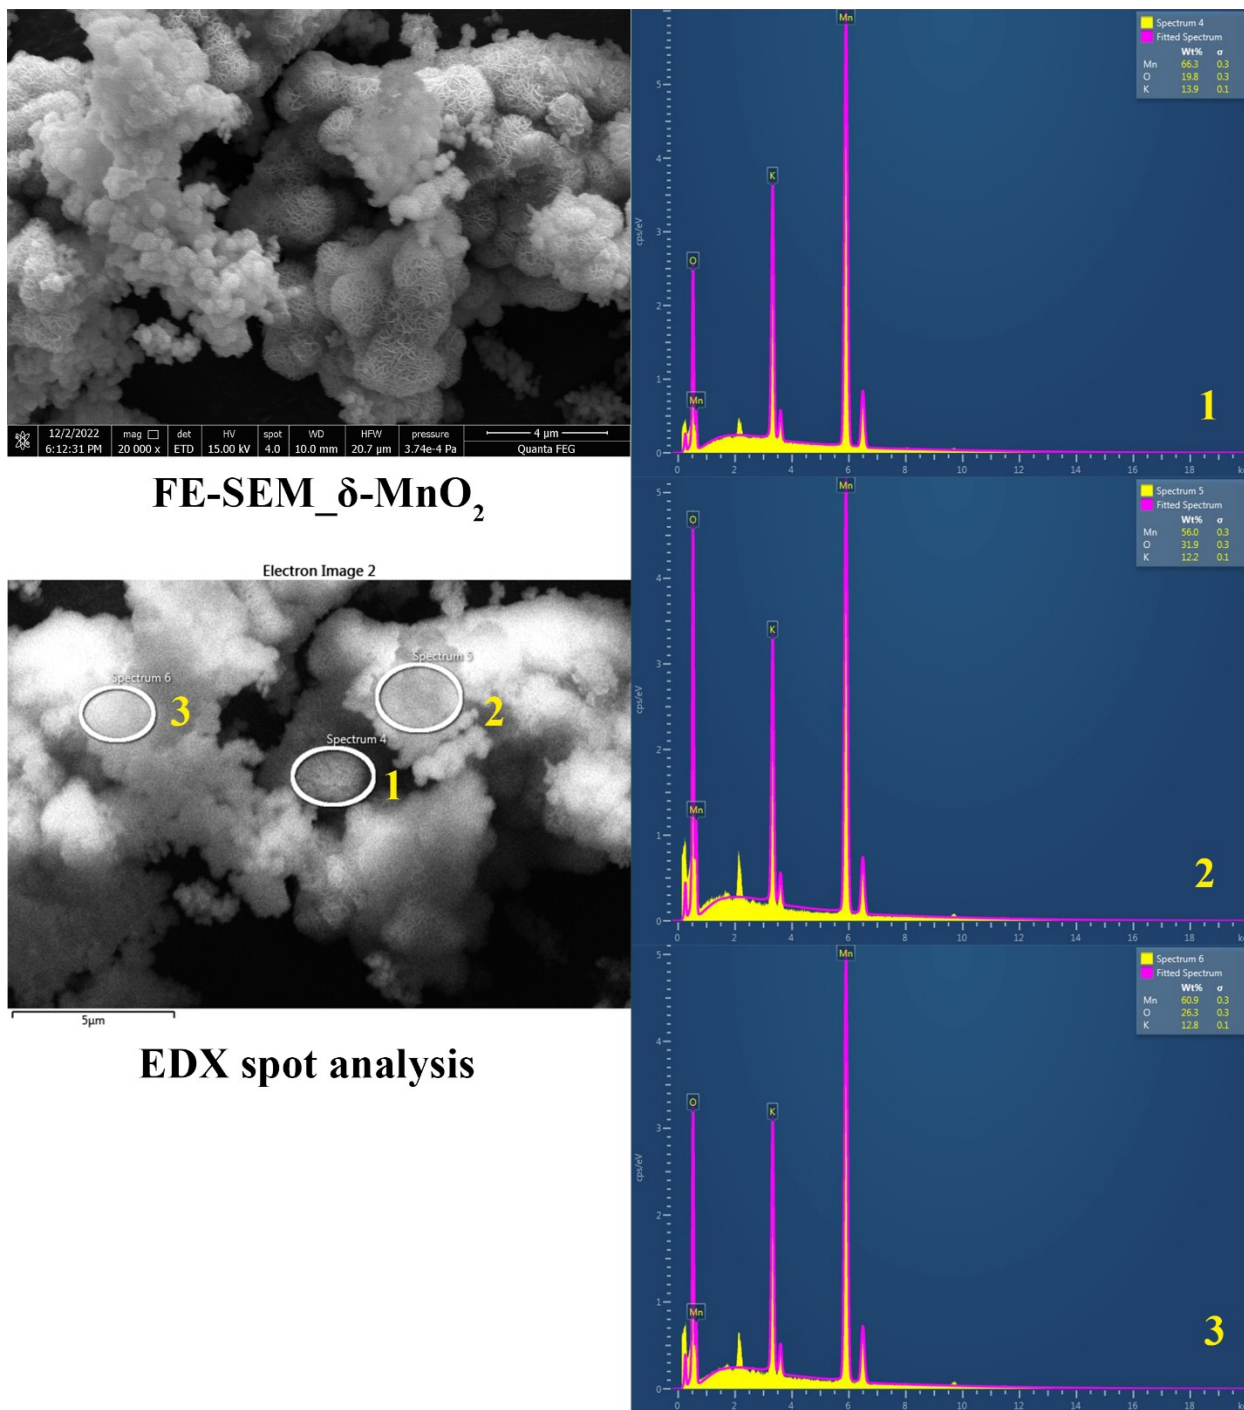

Figure S6. EDX-Spectra of the synthesized MnO<sub>2</sub> recorded by spot analysis.

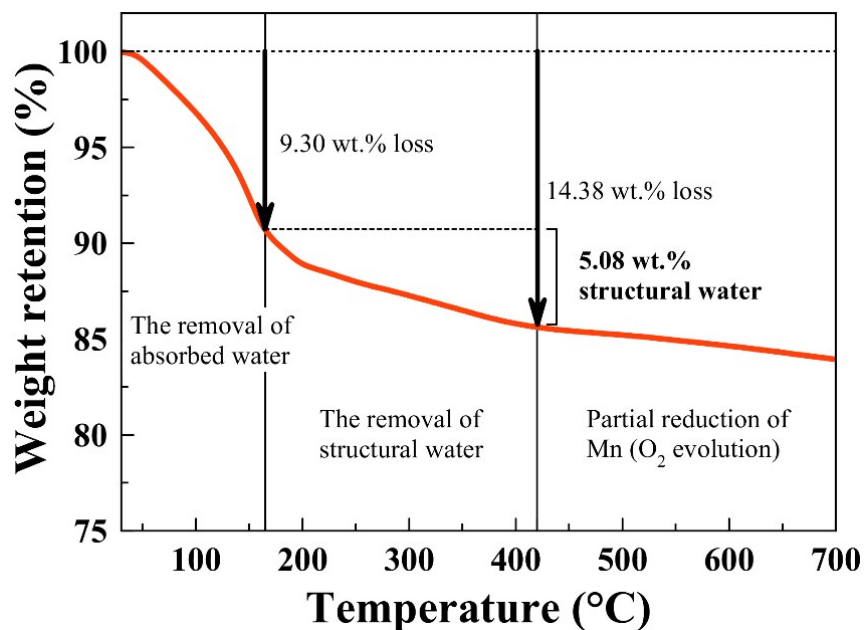

Figure S7. TGA result of the synthesized  $\text{MnO}_2$ : scan rate of  $5^\circ\text{C}$  per min at  $T = 30\text{-}700^\circ\text{C}$ .

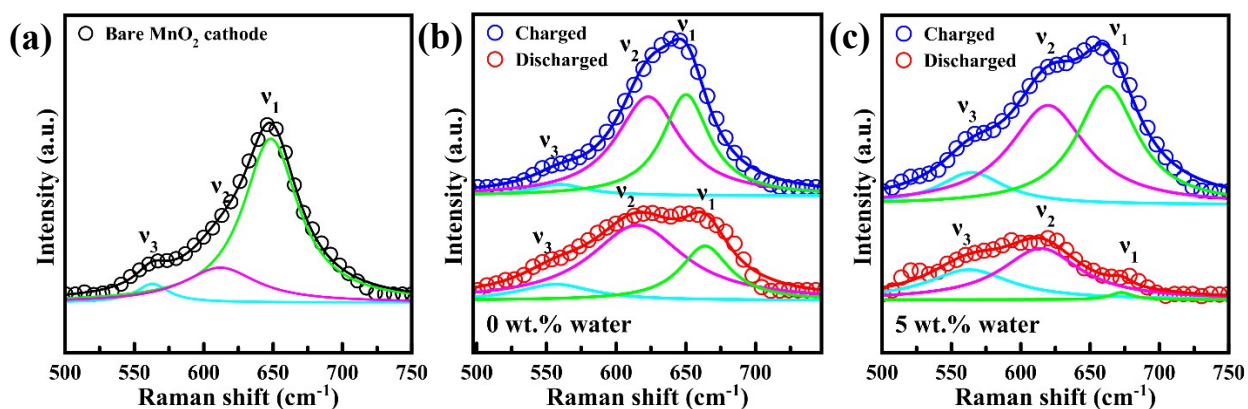

Fig. S8. Lorentzian fitting results of the Raman spectra of: (a) Bare  $\delta\text{-MnO}_2$  cathode, (b) 0 wt.% sample, and (c) 5 wt.% sample.

Raman bands:  $\nu_1$ ,  $\nu_2$  and  $\nu_3$ , which can be assigned to a symmetric stretching vibration of Mn-O band in the  $\text{MnO}_6$  octahedra, a Mn-O lattice vibration and a Mn-O lattice vibration of the basal plane of the  $\text{MnO}_2$  sheets, respectively, existed in both charged and discharged cathode of both 0 and 5 wt.% samples, indicating that a “layered to layered” transformation occurred in both the 0 and 5 wt.% sample [22]. Upon the discharging,  $\nu_1$  of both the 0 and 5 wt.% proceeded to the higher wave number (blue shift), whereas  $\nu_2$  shifted to the lower wave number (red shift), indicating the decrease of Mn oxidation number and the elongation of  $\text{MnO}_6$  unit cell (Jahn–Teller distortion) [23].



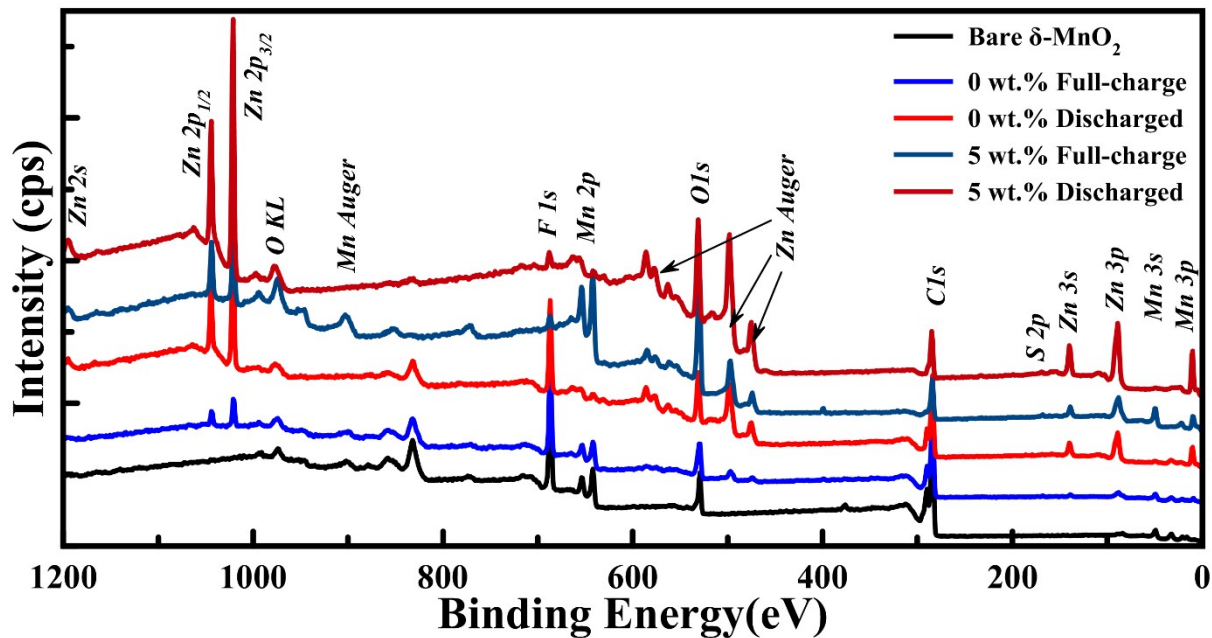

Figure S9. Wide scan XPS of all cathodes: binding energy range of 0-1200 eV.

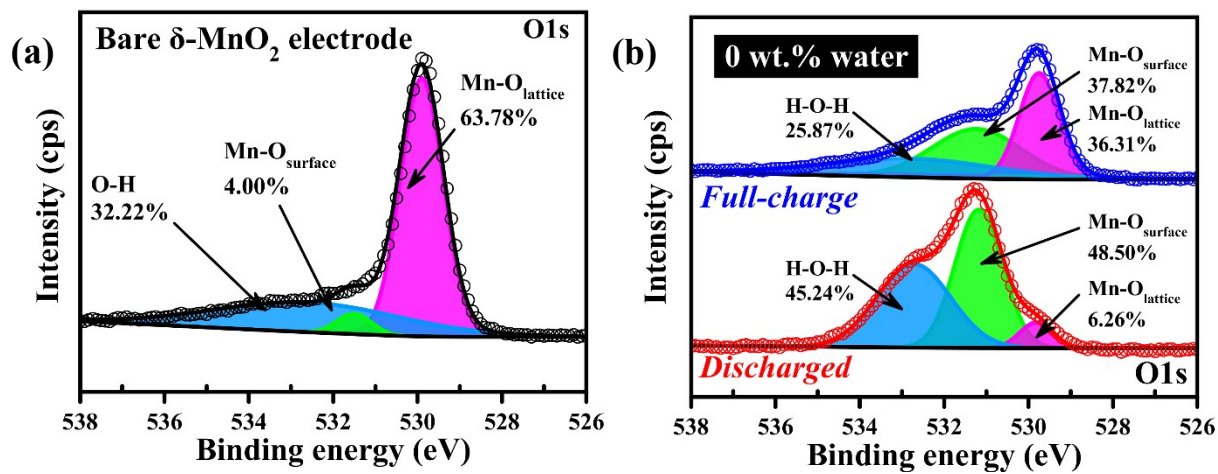

Figure S10. O 1s XPS spectrum of: (a) the bare  $\delta$ -MnO<sub>2</sub> cathode and (b) the 0 wt.% water sample.

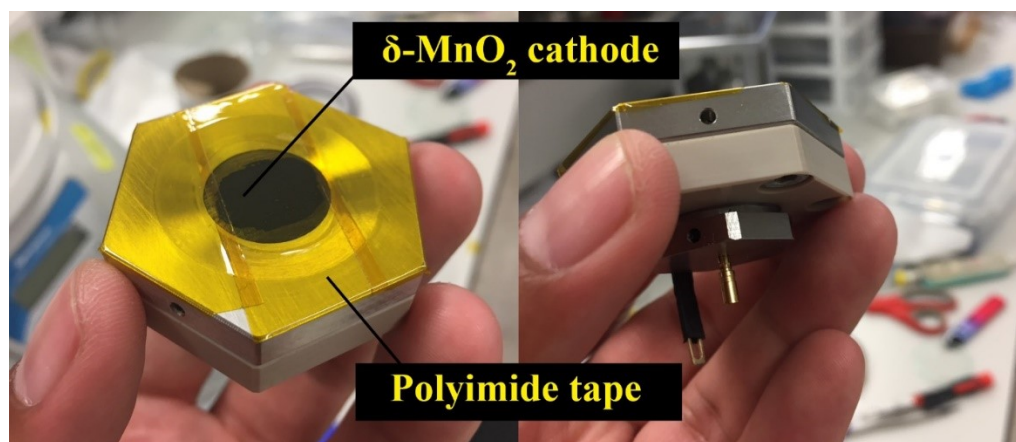

Figure S11. Swagelok type cell for the operando XRD.

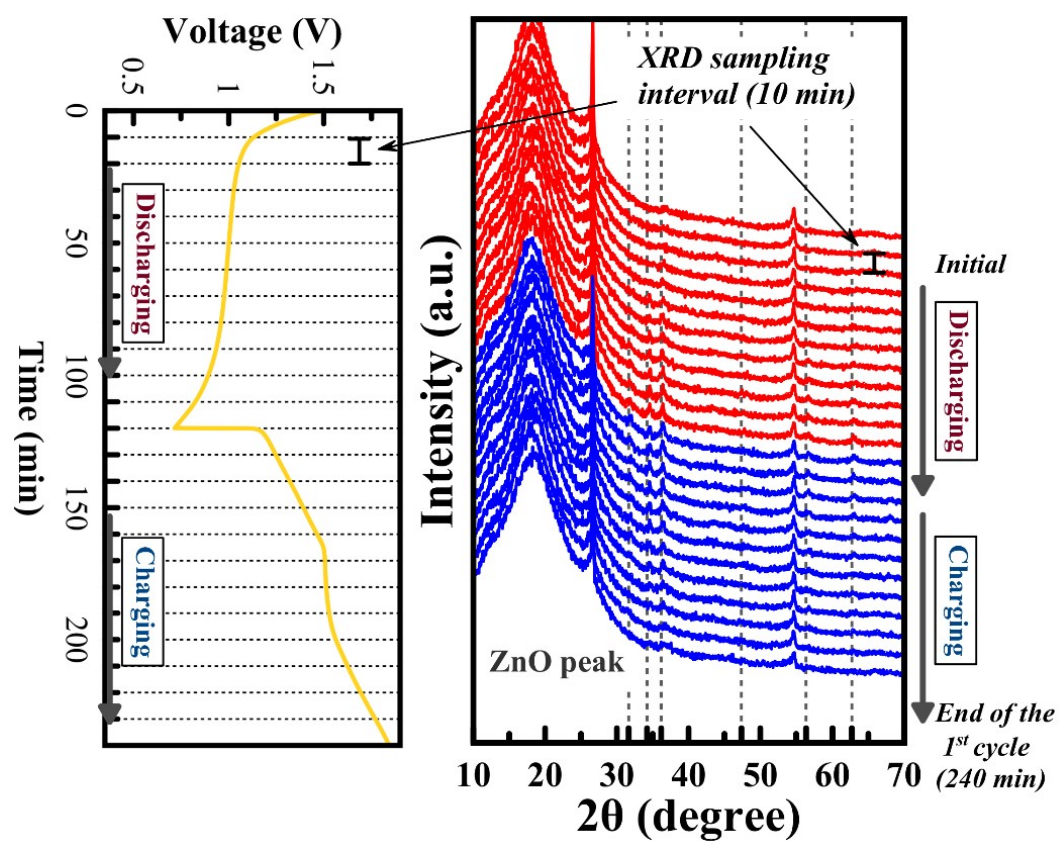

Figure S12. Operando XRD spectra of the Zn/MnO<sub>2</sub> battery having 5 wt.% water DMSO within angle (2theta) of 10-70°.

## References

1. W. Kao-ian, M. T. Nguyen, T. Yonezawa, R. Pornprasertsuk, J. Qin, S. Siwamogsatham and S. Kheawhom, *Materials Today Energy*, 2021, DOI: 10.1016/j.mtener.2021.100738, 100738, DOI: 10.1016/j.mtener.2021.100738.
2. J. Zhao, J. Zhang, W. Yang, B. Chen, Z. Zhao, H. Qiu, S. Dong, X. Zhou, G. Cui and L. Chen, *Nano Energy*, 2019, 57, 625-634, DOI: 10.1016/j.nanoen.2018.12.086.
3. H. Qiu, X. Du, J. Zhao, Y. Wang, J. Ju, Z. Chen, Z. Hu, D. Yan, X. Zhou and G. Cui, *Nature Communications*, 2019, 10, 5374, DOI: 10.1038/s41467-019-13436-3.
4. P. Senguttuvan, S.-D. Han, S. Kim, A. L. Lipson, S. Tepavcevic, T. T. Fister, I. D. Bloom, A. K. Burrell and C. S. Johnson, *Advanced Energy Materials*, 2016, 6, 1600826, DOI: 10.1002/aenm.201600826.
5. Y. Dong, S. Di, F. Zhang, X. Bian, Y. Wang, J. Xu, L. Wang, F. Cheng and N. Zhang, *Journal of Materials Chemistry A*, 2020, 8, 3252-3261, DOI: 10.1039/C9TA13068C.
6. C. Pan, R. G. Nuzzo and A. A. Gewirth, *Chem. Mater.*, 2017, 29, 9351-9359, DOI: 10.1021/acs.chemmater.7b03340.
7. C. Pan, R. Zhang, R. G. Nuzzo and A. A. Gewirth, *Advanced Energy Materials*, 2018, 8, 1800589, DOI: 10.1002/aenm.201800589.
8. M. S. Chae, J. W. Heo, H. H. Kwak, H. Lee and S.-T. Hong, *J. Power Sources*, 2017, 337, 204-211, DOI: 10.1016/j.jpowsour.2016.10.083.
9. Q. Li, K. Ma, G. Yang and C. Wang, *Energy Storage Materials*, 2020, 29, 246-253, DOI: 10.1016/j.ensm.2020.04.030.
10. L. Ma, S. Chen, N. Li, Z. Liu, Z. Tang, J. A. Zapien, S. Chen, J. Fan and C. Zhi, *Adv. Mater.*, 2020, 32, 1908121, DOI: 10.1002/adma.201908121.
11. A. Guerfi, J. Trottier, I. Boyano, I. De Meazza, J. A. Blazquez, S. Brewer, K. S. Ryder, A. Vijn and K. Zaghib, *J. Power Sources*, 2014, 248, 1099-1104, DOI: 10.1016/j.jpowsour.2013.09.082.
12. N. Wang, X. Dong, B. Wang, Z. Guo, Z. Wang, R. Wang, X. Qiu and Y. Wang, *Angew. Chem. Int. Ed.*, 2020, 59, 14577-14583, DOI: 10.1002/anie.202005603.
13. N. Zhang, Y. Dong, Y. Wang, Y. Wang, J. Li, J. Xu, Y. Liu, L. Jiao and F. Cheng, *ACS Applied Materials & Interfaces*, 2019, 11, 32978-32986, DOI: 10.1021/acsami.9b10399.
14. L. Miao, R. Wang, W. Xin, L. Zhang, Y. Geng, H. Peng, Z. Yan, D. Jiang, Z. Qian and Z. Zhu, *Energy Storage Materials*, 2022, 49, 445-453, DOI: 10.1016/j.ensm.2022.04.032.
15. W. Kao-ian, A. A. Mohamad, W.-R. Liu, R. Pornprasertsuk, S. Siwamogsatham and S. Kheawhom, *Batteries & Supercaps*, 2022, 5, e202100361, DOI: 10.1002/batt.202100361.
16. M. H. Alfaruqi, J. Gim, S. Kim, J. Song, J. Jo, S. Kim, V. Mathew and J. Kim, *Journal of Power Sources*, 2015, 288, 320-327, DOI: 10.1016/j.jpowsour.2015.04.140.
17. H. Pan, Y. Shao, P. Yan, Y. Cheng, K. S. Han, Z. Nie, C. Wang, J. Yang, X. Li, P. Bhattacharya, K. T. Mueller and J. Liu, *Nature Energy*, 2016, 1, 16039, DOI: 10.1038/nenergy.2016.39.

18. S. Islam, M. H. Alfaruqi, V. Mathew, J. Song, S. Kim, S. Kim, J. Jo, J. P. Baboo, D. T. Pham, D. Y. Putro, Y.-K. Sun and J. Kim, *Journal of Materials Chemistry A*, 2017, 5, 23299-23309, DOI: 10.1039/C7TA07170A.
19. N. Zhang, F. Cheng, J. Liu, L. Wang, X. Long, X. Liu, F. Li and J. Chen, *Nature Communications*, 2017, 8, 405, DOI: 10.1038/s41467-017-00467-x.
20. M. H. Alfaruqi, J. Gim, S. Kim, J. Song, D. T. Pham, J. Jo, Z. Xiu, V. Mathew and J. Kim, *Electrochem. Commun.*, 2015, 60, 121-125, DOI: 10.1016/j.elecom.2015.08.019.
21. C. Guo, H. Liu, J. Li, Z. Hou, J. Liang, J. Zhou, Y. Zhu and Y. Qian, *Electrochimica Acta*, 2019, 304, 370-377, DOI: 10.1016/j.electacta.2019.03.008.
22. Y. Jiang, D. Ba, Y. Li and J. Liu, *Advanced Science*, 2020, 7, 1902795, DOI: 10.1002/advs.201902795.
23. L. Liu, L. Su, Y. Lu, Q. Zhang, L. Zhang, S. Lei, S. Shi, M. D. Levi and X. Yan, *Advanced Functional Materials*, 2019, 29, 1806778, DOI: 10.1002/adfm.201806778.
